## Arbitrary Boolean logical search operations on massive molecular file systems

James L. Banal<sup>1†</sup>, Tyson R. Shepherd<sup>1†</sup>, Joseph Berleant<sup>1†</sup>, Hellen Huang<sup>1</sup>, Miguel Reyes<sup>1,2</sup>,

Cheri M. Ackerman<sup>2</sup>, Paul C. Blainey<sup>1,2,3</sup>, and Mark Bathe<sup>1,2\*</sup>

<sup>1</sup>Department of Biological Engineering, Massachusetts Institute of Technology, Cambridge, MA 02139 USA.

<sup>2</sup>Broad Institute of MIT and Harvard, Cambridge, MA 02142 USA.

<sup>3</sup>Koch Institute for Integrative Cancer Research at MIT, Cambridge, MA 02142 USA.

\*Correspondence should be addressed to: [mark.bathe@mit.edu](mailto:mark.bathe@mit.edu)

†These authors contributed equally to this work.

1 **DNA is an ultra-high-density storage medium that could meet exponentially growing**  
2 **worldwide data storage demand. However, accessing arbitrary data subsets within exabyte-**  
3 **scale DNA data pools is limited by the finite addressing space for individual DNA-based**  
4 **blocks of data. Here, we form files by encapsulating data-encoding DNA within silica**  
5 **capsules that are surface-labeled with multiple unique barcodes. Barcoding is performed**  
6 **with single-stranded DNA representing file metadata that enables Boolean logic selection on**  
7 **the entire pool of data. We demonstrate encapsulation and Boolean selection of sub-pools of**  
8 **image files using fluorescence-activated sorting, with selection sensitivity of 1 in  $10^6$  files per**  
9 **channel. Our strategy in principle enables retrieval of targeted data subsets from exabyte-**  
10 **and larger-scale data pools, thereby offering a random access file system for massive**  
11 **molecular data sets.**

12

13 DNA is the polymer used for storage and transmission of genetic information in biology. In  
14 principle, DNA can also be used as a medium for the storage of arbitrary digital information at  
15 densities far exceeding existing commercial data storage technologies and at scales well beyond  
16 the capacity of current data centers <sup>1</sup>. Ongoing advances in nucleic acid synthesis and sequencing  
17 technologies also continue to reduce dramatically the cost of writing and reading DNA, thereby  
18 rendering DNA-based digital information storage potentially viable economically in the near  
19 future <sup>2-5</sup>. As demonstrations of its viability as a general information storage medium, to date  
20 books, images, computer programs, audio clips, works of art, and Shakespeare's sonnets have all  
21 been stored in DNA using a variety of encoding schemes <sup>6-12</sup>. In each case, digital information was  
22 converted to DNA sequences and typically fragmented into 100–200 nucleotide (nt) blocks of data

23 for ease of chemical synthesis and sequencing. Sequence fragments were then assembled to  
24 reconstruct the original, encoded information.

25 While significant research effort has focused on improving DNA synthesis and encoding  
26 schemes, an additional, crucial aspect of digital data storage and retrieval is the ability to access  
27 specific subsets of a data pool on demand, which is conventionally achieved using polymerase  
28 chain reaction (PCR) <sup>8,10,12</sup>. PCR-based strategies take advantage of the ease of replication of DNA  
29 to extract specific DNA sequences from a DNA data pool using custom-designed forward and  
30 reverse primers that are complementary to the flanking sequences of interest. Nested addressing  
31 barcodes <sup>13-15</sup> can also be used to uniquely identify files using multiple barcodes. For an exabyte-  
32 scale data pool, each file requires at least four barcodes, or up to one hundred nucleotides in total  
33 barcode sequence length, thereby nearly eliminating the number of nucleotides that can be used  
34 for data encoding. Further, orthogonality of barcodes to other barcodes and file sequences present  
35 in the data pool is essential for reliable data access. To overcome these limitations, previous  
36 approaches have used spatial segregation of data into distinct pools <sup>16</sup>. While PCR is typically  
37 known for its ease of amplifying specific DNA sequences, errors in priming via strand crosstalk  
38 can lead to information loss. In addition, selective amplification of a specific file using PCR  
39 requires access to the entire data pool for each query, which is also destructive to the sample  
40 queried. Finally, PCR-based approaches do not allow for physical deletion of specific files from a  
41 data pool, other than implementing an address overwrite <sup>10</sup>.

42 As an alternative to PCR-based data access, inspired by genomic segmentation within  
43 biological cells, here we physically encapsulate and thereby isolate DNA-based molecular data  
44 within discrete silica capsules, which we subsequently label to enable random access of the data  
45 pool via hybridization and subsequent optical selection. Each unit of information encoded in DNA

46 we term a *file*, which includes both the DNA encoding the main data as well as any additional  
47 components used for addressing, storage, and retrieval. Each file contains a *file sequence*,  
48 consisting of the DNA encoding the main data, and *addressing barcodes*, or simply *barcodes*,  
49 which are additional short DNA sequences used to identify the file in solution using hybridization.  
50 We refer to a collection of files as a *data pool* or *database*, and the procedures for storing,  
51 retrieving, and reading out files is termed a *file system* (see **Supplementary Section S0** for a full  
52 list of terms).

53 As a proof-of-principle of our file system, we encapsulated 3,000-nt plasmids encoding 85-  
54 byte images, the files, within monodisperse, 6- $\mu$ m spherical silica particles that were chemically  
55 surface-labeled using up to three 25-mer single-stranded DNA (ssDNA) oligonucleotides, the  
56 barcodes, chosen from a library of 240,000 orthogonal primers, allowing identification of up to  
57  $\sim 10^{15}$  possible distinct files using only three unique barcodes per file <sup>17</sup> (**Fig. 1**). Twenty icon-  
58 resolution images were chosen in the data pool to represent diverse subject matter including  
59 animals, plants, transportation, and buildings, and labeled with DNA barcodes that represent the  
60 categories to which each image belongs (**Supplementary Fig. 1**). Fluorescence-activated sorting  
61 (FAS) was used to select target subsets of the complete data pool by first annealing fluorescent  
62 oligonucleotide probes that are complementary to the barcodes, in order to address the DNA  
63 database <sup>18</sup>. Retrieval of specific, individual files and collections of files described by Boolean  
64 AND, OR, and NOT logic was achieved using combinations of distinct barcodes to query the data  
65 pool. Because physical encapsulation separates file sequences from barcodes used to describe the  
66 encapsulated information, our file system offers highly specific, robust data retrieval operations;  
67 the ability to delete specific subsets of data; in addition to long-term environmental protection of  
68 encoded file sequences via silica encapsulation <sup>9,19,20</sup>. While we apply our proposed file system to

69 a prototypical kilobyte-scale image database here, our approach is fully scalable to massive  
70 molecular data pools at the exabyte- and larger-scales, as well as alternative encapsulation  
71 strategies <sup>21,22</sup>, barcode implementations <sup>23-27</sup>, and physical or other sorting strategies using  
72 biochemical affinity, optical, or other labeling approaches <sup>28-30</sup>.

73

## 74 **File Synthesis**

75 Digital information in the form of 20 icon-resolution images was stored in a data pool, with each  
76 image encoded into DNA and synthesized on a plasmid. We selected images of broad diversity,  
77 representative of distinct and shared subject categories, which included several domestic and wild  
78 cats and dogs, US presidents, and several human-made objects such as an airplane, boats, and  
79 buildings (**Fig. 1** and **Supplementary Fig. 1**). To implement this image database, the images were  
80 substituted with black-and-white,  $26 \times 26$ -pixel images to minimize synthesis costs, compressed  
81 using run-length encoding, and converted to DNA (**Supplementary Fig. 1, 2**). Following  
82 synthesis, bacterial amplification, and sequencing validation (**Supplementary Fig. 3**), each  
83 plasmid DNA was separately encapsulated into silica particles containing a fluorescein dye core  
84 and a positively charged surface <sup>19,20</sup>. Because the negatively charged phosphate groups of the  
85 DNA interact with positively charged silica particles, plasmid DNA condensed on the silica  
86 surface, after which N-[3-(trimethoxysilyl)propyl]-N,N,N-trimethylammonium chloride  
87 (TMAPS) was co-condensed with tetraethoxysilane to form an encapsulation shell after four days  
88 of incubation at room-temperature <sup>9,20</sup> (**Fig. 2a**) to form discrete silica capsules containing the file  
89 sequence that encodes for the image file. Quantitative PCR (qPCR) of the reaction supernatant  
90 after encapsulation (**Supplementary Fig. 4**) showed full encapsulation of plasmids without  
91 residual DNA in solution. To investigate the fraction of capsules that contained plasmid DNA, we

92 compared the fluorescence intensity of the intercalating dye TO-PRO when added pre- versus post-  
93 encapsulation (**Supplementary Fig. 2**). All capsules synthesized in the presence of both DNA and  
94 TO-PRO showed a distinct fluorescence signal, consistent with the presence of plasmid DNA in  
95 the majority of capsules, compared with a silica particle negative control that contained no DNA.  
96 In order to test whether plasmid DNA was fully encapsulated versus partially exposed at the  
97 surface of capsules, capsules were also stained separately with TO-PRO post-encapsulation (**Fig.**  
98 **2b**). Using qPCR, we estimated  $10^6$  plasmids per capsule assuming quantitative recovery of DNA  
99 post-encapsulation (**Supplementary Fig. 5**).

100       Next, we chemically attached unique content addresses on the surfaces of silica capsules  
101 using orthogonal 25-mer ssDNA barcodes (**Supplementary Fig. 6**) describing selected features of  
102 the underlying image. For example, the image of an orange tabby house cat (**Supplementary Fig.**  
103 **1**) was described with *cat*, *orange*, and *domestic*, whereas the image of a tiger was described with  
104 *cat*, *orange*, and *wild* (**Supplementary Fig. 1** and **Supplementary Table 2**). To attach the  
105 barcodes, we activated the surface of the silica capsules through a series of chemical steps.  
106 Condensation of  $\gamma$ -aminopropyltriethoxysilane with the hydroxy-terminated surface of the  
107 encapsulated plasmid DNA provided a primary amine chemical handle that supported further  
108 conjugation reactions (**Fig. 2c**). We modified the amino-modified surface of the silica capsules  
109 with  $\beta$ -azidoacetic acid N-hydroxysuccinimide (NHS) ester followed by an oligo(ethylene glycol)  
110 that contained two chemically orthogonal functional groups: the dibenzocyclooctyne functional  
111 group reacted with the surface-attached azide through strain-promoted azide-alkyne cycloaddition  
112 while the NHS ester functional group was available for subsequent conjugation with a primary  
113 amine. Each of the associated barcodes contained a 5'-amino modification that could react with  
114 the NHS-ester groups on the surface of the silica capsules, thereby producing the complete form

115 of our file. Notably, the sizes of bare, hydroxy-terminated silica particles representing capsules  
116 without barcodes were comparable with complete files consisting of capsules with barcodes  
117 attached, confirmed using scanning electron microscopy (**Fig. 2d** and **2e**, left). These results were  
118 anticipated given that the encapsulation thickness was only on the order of 10 nm<sup>20</sup> and that  
119 additional steps to attach functional groups minimally increases the capsule diameter. We also  
120 observed systematic shifts in the surface charge of the silica particles as different functional groups  
121 were introduced onto their surfaces (**Fig. 2e**). Using hybridization assays with fluorescently-  
122 labelled probes<sup>31-33</sup>, we estimated the number of barcodes available for hybridization on our files  
123 to be on the order of 10<sup>8</sup> (**Supplementary Fig. 7**). Following synthesis, files were pooled and  
124 stored together for subsequent retrieval. Illumina MiSeq was used to read each file sequence and  
125 reconstruct the encoded image following selection and de-encapsulation, in order to validate the  
126 complete process of image file encoding, encapsulation, barcoding, selection, de-encapsulation,  
127 sequencing, and image file reconstruction (**Supplementary Figs. 9, 10**).

128

### 129 **File Selection**

130 Following file synthesis and pooling, we used FAS to select specific targeted file subsets from the  
131 entire data pool. All files contained a fluorescent dye, fluorescein, in their core as a marker to  
132 distinguish files from other particulates such as spurious silica particles that nucleated in the  
133 absence of a core or insoluble salts that may have formed during the sorting process. Each detected  
134 fluorescein event was therefore interpreted to indicate the presence of an individual file at  
135 sufficiently low concentrations queried using FAS (**Supplementary Fig. 11**). For any query  
136 applied to the entire image database, a fluorescently-labelled ssDNA probe hybridized to its  
137 complementary barcode displayed externally on the surface of the silica capsule (**Fig. 3a**).

138 We subjected the entire data pool to a series of experiments to test selection sensitivity of  
139 target subsets using distinct queries. First, we evaluated single-barcode selection of an individual  
140 file, specifically *Airplane*, out of a pool of varying concentrations of the nineteen other files as  
141 background (**Fig. 3b**). To select the *Airplane* file, we hybridized an AFDye 647-labelled ssDNA  
142 probe that is complementary to the barcode *flying*, which is unique to *Airplane*. We were able to  
143 detect and select the desired *Airplane* file through FAS even at a relative abundance of  $10^{-6}$   
144 compared with each other file (**Fig. 3c**). Comparison of the retrieved sequences between the flying  
145 gate and the NOT flying gate after chemical release of the file sequences from silica encapsulation  
146 revealed that 60–95% of the *Airplane* files were sorted into the flying gate (**Supplementary Figs.**  
147 **18–21**). Note that any sort probability above 50% indicates enrichment of *Airplane* within the  
148 correct population subset (flying) relative to the incorrect subset (NOT flying), while a sort  
149 probability of 100% would indicate ideal performance.

150

## 151 **Boolean Search**

152 Aside from selecting single files, Boolean logic can be used to select a specific subset of the data  
153 pool. We demonstrated AND, OR, and NOT logical operations by first adding to the data pool  
154 fluorescently-labelled ssDNA probes that were complementary to the barcodes (**Fig. 4**, left). This  
155 hybridization reaction was used to distinguish one or several files in the data pool, which were  
156 then sorted using FAS. We used two to four fluorescence channels simultaneously to create the  
157 FAS gates that executed the target Boolean logic queries (**Fig. 4**, middle). To demonstrate a NOT  
158 query, we added to the data pool an AFDye 647-labelled ssDNA probe that hybridized to files that  
159 contained the *cat* barcode. Files that did not show AFDye 647 signal were sorted into the NOT *cat*  
160 subset (**Fig. 4a**). An example of an OR gate was applied to the data pool by simultaneously adding



161 *dog* and *building* probes that both had the TAMRA label (**Fig. 4b**). All files that showed TAMRA  
162 signal were sorted into the dog OR building subset by the FAS. Finally, an example of an AND  
163 gate was achieved by adding *fruit* and *yellow* probes that were labelled with AFDye 647 and  
164 TAMRA, respectively. Files showing signal for both AFDye 647 and TAMRA were sorted into  
165 the fruit AND yellow subset in the FAS (**Fig. 4c**). For each example query, we validated our sorting  
166 experiments by releasing the file sequence from silica encapsulation and sequencing the released  
167 DNA with Illumina MiniSeq (**Fig. 4**, right). Sort probabilities of each file for each search query  
168 are shown in **Supplementary Figs. S22–S24**.

169       The preceding demonstrations of Boolean logic gates enable sorting of files with varying  
170 specificity of selection criteria for the retrieval of different subsets of the data pool. FAS can also  
171 be used to create multiple gating conditions simultaneously, thereby increasing the specificity of  
172 file selections. To demonstrate increasingly complex Boolean search queries, we selected the file  
173 containing the image of Abraham Lincoln from the data pool, which included images of two  
174 presidents, George Washington and Abraham Lincoln. The *president* ssDNA probe, fluorescently-  
175 labeled with TAMRA, selected both *Lincoln* and *Washington* files from the data pool. The  
176 simultaneous addition of the *18<sup>th</sup> century* ssDNA probe, fluorescently-labeled with AFDye 647  
177 (**Fig. 5a**, left), discriminated *Washington*, which contained the *18<sup>th</sup> century* barcode, from the  
178 *Lincoln* file (**Fig. 5a**, middle). The combination of these two ssDNA probes permitted the complex  
179 search query president AND (NOT 18<sup>th</sup> century). Sequencing analysis of the gated populations  
180 after reverse encapsulation validated that the sorted populations matched search queries for  
181 president AND (NOT 18<sup>th</sup> century), president AND 18<sup>th</sup> century, and NOT president (**Fig. 5a**,  
182 right; **Supplementary Fig. 25**).

183 To demonstrate the possibility of performing Boolean search using more than three  
184 fluorescence channels for sorting, we selected the *Wolf* file from the data pool using the query dog  
185 AND wild, and used the *black & white* probe to validate the selected file (**Fig. 5b**, left). Because  
186 conventional FAS software is only capable of sorting using 1D and 2D gates, we first selected one  
187 out of the three possible 2D plots (**Fig. 5b**, left and bottom): *dog*-TAMRA against *wild*-AFDye  
188 647. We examined the *black & white*-TYE705 channel on members of the dog AND wild subset  
189 (**Fig. 5b**, left and bottom). Release of the encapsulated file sequence and subsequent sequencing  
190 of each gated population from the *dog* versus *wild* 2D plot validated sorting (**Fig. 5b**, right;  
191 **Supplementary Fig. 26**).

192 The use of plasmids as a substrate for encoding information offered a convenient workflow  
193 for restoring files into the data pool after retrieval. In cases where single images were sorted (**Figs.**  
194 **4c, 5a, b**), we were able to transform competent bacteria from each search query that resulted in a  
195 single file (**Supplementary Fig. 27**). Amplified material was pure and ready for re-encapsulation  
196 into silica particles, which could be re-introduced directly back into the data pool. Importantly, our  
197 molecular file system and file selection process thereby represents a complete write-access-read  
198 cycle that can in principle be applied to exabyte and larger-scale datasets. While sort probabilities  
199 were typically below the perfect 100% targeted for a specific file or file subset query, future work  
200 would be required to better characterize sources of error that may be due to sample contamination,  
201 FAS error, or imperfect orthogonality of barcode sequences employed (**Supplementary Fig. 6**)<sup>17</sup>.

202

## 203 **Outlook**

204 We present a non-destructive molecular file system that is capable of both specific file selection  
205 and Boolean logic search operations for random access of single files or file subsets in a data pool.

206 Our implementation easily scales by increasing the numbers of barcodes per file and query  
207 fluorophores used for file selection, which can thereby address files in a larger-scale database for  
208 random access and computation. For example, labeling each file using four distinct barcodes  
209 instead of only the three used here renders it possible to label  $\binom{2.4 \times 10^5}{4} \approx 10^{20}$  files uniquely using  
210 the existing pool of  $\sim 10^5$  orthogonal barcodes<sup>17</sup>. Assuming an FAS system is capable of sorting a  
211 single file from  $10^6$  others using each fluorescent channel alone, as demonstrated in this work using  
212 a commercial FAS, one may theoretically sort a single file from  $10^{24}$  others using a conventional  
213 four-channel FAS system. This file system would then in principle offer sufficient sensitivity and  
214 specificity to select a single file from an exabyte or even yottabyte data pool. However, the time  
215 needed to perform FAS scales linearly with the size of the data pool, which may be prohibitively  
216 long even for exabyte-scale data pools using only 10–100 bytes per file. For example, 12 minutes  
217 was required to select at least one hundred copies of the *Airplane* file in a data pool in which this  
218 file has a relative abundance of  $10^{-6}$  compared with other files (**Fig. 3**). This is in contrast to  
219 selecting one hundred copies of the *Airplane* file in a data pool that contained equivalent numbers  
220 of nineteen other files, which required only  $\sim 30$  seconds. Thus, in order to search through an entire  
221 exabyte-scale data pool within 24 hours, each file should consist of approximately 100 gigabytes,  
222 assuming a typical commercial FAS device that searches at 10,000 files per second. In order to  
223 reduce file selection time, future implementations of our molecular file system should therefore  
224 leverage parallel microfluidics-based optical sorting procedures and brighter fluorescence probes  
225 to increase selection throughput and sensitivity, and thereby reduce the pool search time.  
226 Alternatively, direct magnetic pulldown of files labelled with biochemical or affinity tags may be  
227 employed<sup>30</sup>.

228           Aside from speed and specificity of data access, data density is also of importance to DNA  
229 data storage. Notably, both file size and data density can be tuned independently in our file system  
230 by changing the information content of loaded DNA and the size of the silica particles employed  
231 for encapsulation. While we used 6- $\mu\text{m}$  silica core particles here in order to maximize fluorescence  
232 signal-to-noise ratios for a commercial FAS instrument, this also limited volumetric density of our  
233 DNA file system<sup>3</sup>. Specifically, using this approach an exabyte-scale data pool consisting of a  
234 100-byte file per particle would require approximately  $10^{16}$  files and  $1 \text{ m}^3$  total dry volume, or  $10^{18}$   
235 bytes per  $\text{m}^3$ . In comparison, PCR-based random access has a theoretical volumetric density limit  
236 of  $10^{24}$  bytes per  $\text{m}^3$ <sup>3</sup>, although additional methods are required to prevent crosstalk between file  
237 sequences and barcodes. To further increase the data density of our file system, future  
238 implementations may benefit from using nanoparticles  $\sim 100\text{--}200 \text{ nm}$  in diameter to encode files  
239<sup>9,19,20</sup> and higher sensitivity FAS systems<sup>34,35</sup> or direct biochemical, magnetic, or other pulldown  
240 for file and data subset selection from the data pool.

241           Beyond increasing file selection speed and data density, utilization of spectrally distinct  
242 fluorescent probes and discrete labeling intensities<sup>26</sup> would allow for far more complex and  
243 efficient logical operations than demonstrated here<sup>36</sup>. Physical particle parameters including  
244 forward and side-scatter could additionally be used to perform multi-dimensional sorting of  
245 particles with different scattering cross-sections, with or without additional fluorescence channels  
246<sup>37</sup>. Repeated cycles of file selection in series could also further increase selection fidelity. While  
247 our technical approach differs significantly from approaches that rely on selective amplification  
248 for block selection<sup>8,12,16</sup>, in which amplifications may reduce fidelity of file selection, PCR-based  
249 random access approaches will typically have faster read-write times because they forgo  
250 encapsulation and de-encapsulation steps required by our approach<sup>9,19,20</sup>, which is therefore ideally

251 suited to long-term, archival data storage and retrieval with periodic file and barcode renewal.  
252 Aside from DNA data storage, population enrichment on our prototypical database of 20 unique  
253 files encoded in DNA plasmids with silica encapsulation and retrieval demonstrated using  
254 barcodes labels may alternatively be applied directly to biological DNA and other nanoscale  
255 sample management, such as genomic samples in biobanking or protein-encoding databases<sup>38</sup>. In  
256 either case, subsets of data or genomic sample pools may be enriched using Boolean AND, OR,  
257 and NOT logic, which complements existing PCR-based approaches. These operations enrich the  
258 capabilities of performing computation and sorting on underlying molecular data pools, moving  
259 us closer to realizing an economically viable, functional, massive molecular file and operating  
260 system<sup>18,39,40</sup>.

261

## 262 **References**

- 263 1 Ceze, L., Nivala, J. & Strauss, K. Molecular digital data storage using DNA. *Nature*  
264 *Reviews Genetics* **20**, 456-466, doi:10.1038/s41576-019-0125-3 (2019).
- 265 2 Kosuri, S. & Church, G. M. Large-scale de novo DNA synthesis: technologies and  
266 applications. *Nature Methods* **11**, 499-507, doi:10.1038/nmeth.2918 (2014).
- 267 3 Zhirnov, V., Zadegan, R. M., Sandhu, G. S., Church, G. M. & Hughes, W. L. Nucleic  
268 acid memory. *Nature Materials* **15**, 366, doi:10.1038/nmat4594 (2016).
- 269 4 Palluk, S. *et al.* De novo DNA synthesis using polymerase-nucleotide conjugates. *Nature*  
270 *Biotechnology* **36**, 645-650, doi:10.1038/nbt.4173 (2018).
- 271 5 Lee, H. H., Kalhor, R., Goela, N., Bolot, J. & Church, G. M. Terminator-free template-  
272 independent enzymatic DNA synthesis for digital information storage. *Nature*  
273 *Communications* **10**, 2383, doi:10.1038/s41467-019-10258-1 (2019).

- 274 6 Church, G. M., Gao, Y. & Kosuri, S. Next-generation digital information storage in  
275 DNA. *Science* **337**, 1628, doi:10.1126/science.1226355 (2012).
- 276 7 Goldman, N. *et al.* Towards practical, high-capacity, low-maintenance information  
277 storage in synthesized DNA. *Nature* **494**, 77-80, doi:10.1038/nature11875 (2013).
- 278 8 Yazdi, S. M. H. T., Yuan, Y., Ma, J., Zhao, H. & Milenkovic, O. A rewritable, random-  
279 access DNA-based storage system. *Scientific Reports* **5**, 14138, doi:10.1038/srep14138  
280 (2015).
- 281 9 Grass, R. N., Heckel, R., Puddu, M., Paunescu, D. & Stark, W. J. Robust chemical  
282 preservation of digital information on DNA in silica with error-correcting codes.  
283 *Angewandte Chemie International Edition* **54**, 2552-2555, doi:10.1002/anie.201411378  
284 (2015).
- 285 10 Yazdi, S. M. H. T., Gabrys, R. & Milenkovic, O. Portable and error-free DNA-based data  
286 storage. *Scientific Reports* **7**, 5011, doi:10.1038/s41598-017-05188-1 (2017).
- 287 11 Erlich, Y. & Zielinski, D. DNA Fountain enables a robust and efficient storage  
288 architecture. *Science* **355**, 950-954, doi:10.1126/science.aaj2038 (2017).
- 289 12 Organick, L. *et al.* Random access in large-scale DNA data storage. *Nature*  
290 *Biotechnology* **36**, 242–248, doi:10.1038/nbt.4079 (2018).
- 291 13 Kashiwamura, S., Yamamoto, M., Kameda, A., Shiba, T. & Ohuchi, A. in *DNA 2002:*  
292 *DNA Computing*. (eds M. Hagiya & A. Ohuchi) 112–123 (Lecture Notes in Computer  
293 Science, Vol. 2568, Springer, 2003).
- 294 14 Yamamoto, M., Kashiwamura, S., Ohuchi, A. & Furukawa, M. Large-scale DNA  
295 memory based on the nested PCR. *Natural Computing* **7**, 335-346 (2008).

- 296 15 Yamamoto, M., Kashiwamura, S. & Ohuchi, A. in *DNA 2007: DNA Computing*. (eds  
297 M.H. Garzon & H. Yan) 99–108 (Lecture Notes in Computer Science, Vol. 4848,  
298 Springer).
- 299 16 Newman, S. *et al.* High density DNA data storage library via dehydration with digital  
300 microfluidic retrieval. *Nature Communications* **10**, 1706 (2019).
- 301 17 Xu, Q., Schlabach, M. R., Hannon, G. J. & Elledge, S. J. Design of 240,000 orthogonal  
302 25mer DNA barcode probes. *Proceedings of the National Academy of Sciences* **106**,  
303 2289-2294, doi:10.1073/pnas.0812506106 (2009).
- 304 18 Reif, J. H. *et al.* in *DNA 2001: DNA Computing*. (eds N. Jonoska & N.C. Seeman) 231–  
305 247 (Lecture Notes in Computer Science, Vol. 2340, Springer, 2002).
- 306 19 Paunescu, D., Fuhrer, R. & Grass, R. N. Protection and deprotection of DNA--high-  
307 temperature stability of nucleic acid barcodes for polymer labeling. *Angewandte Chemie*  
308 *International Edition* **52**, 4269-4272, doi:10.1002/anie.201208135 (2013).
- 309 20 Paunescu, D., Puddu, M., Soellner, J. O. B., Stoessel, P. R. & Grass, R. N. Reversible  
310 DNA encapsulation in silica to produce ROS-resistant and heat-resistant synthetic DNA  
311 "fossils". *Nature Protocols* **8**, 2440, doi:10.1038/nprot.2013.154 (2013).
- 312 21 Alexakis, T. *et al.* Microencapsulation of DNA within alginate microspheres and  
313 crosslinked chitosan membranes for in vivo application. *Applied Biochemistry and*  
314 *Biotechnology* **50**, 93-106 (1995).
- 315 22 Borodina, T. *et al.* Controlled release of DNA from self-degrading microcapsules.  
316 *Macromolecular Rapid Communications* **28**, 1894-1899, doi:10.1002/marc.200700409  
317 (2007).

- 318 23 Braeckmans, K. *et al.* Encoding microcarriers by spatial selective photobleaching. *Nature*  
319 *Materials* **2**, 169-173, doi:10.1038/nmat828 (2003).
- 320 24 Wilson, R., Cossins, A. R. & Spiller, D. G. Encoded microcarriers for high-throughput  
321 multiplexed detection. *Angewandte Chemie International Edition* **45**, 6104-6117,  
322 doi:10.1002/anie.200600288 (2006).
- 323 25 Pregibon, D. C., Toner, M. & Doyle, P. S. Multifunctional encoded particles for high-  
324 throughput biomolecule analysis. *Science* **315**, 1393-1396, doi:10.1126/science.1134929  
325 (2007).
- 326 26 Dagher, M., Kleinman, M., Ng, A. & Juncker, D. Ensemble multicolour FRET model  
327 enables barcoding at extreme FRET levels. *Nature Nanotechnology* **13**, 925-932,  
328 doi:10.1038/s41565-018-0205-0 (2018).
- 329 27 Martino, N. *et al.* Wavelength-encoded laser particles for massively multiplexed cell  
330 tagging. *Nature Photonics* **13**, 720-727, doi:10.1038/s41566-019-0489-0 (2019).
- 331 28 Lee, H., Kim, J., Kim, H., Kim, J. & Kwon, S. Colour-barcoded magnetic microparticles  
332 for multiplexed bioassays. *Nature Materials* **9**, 745-749, doi:10.1038/nmat2815 (2010).
- 333 29 Stewart, K. *et al.* in *International Conference on DNA Computing and Molecular*  
334 *Programming*. 55-70 (Vol. Springer).
- 335 30 Tomek, K. J. *et al.* Driving the scalability of DNA-based information storage systems.  
336 *ACS Synthetic Biology* **8**, 1241-1248, doi:10.1021/acssynbio.9b00100 (2019).
- 337 31 Pillai, P. P., Reisewitz, S., Schroeder, H. & Niemeyer, C. M. Quantum-dot-encoded silica  
338 nanospheres for nucleic acid hybridization. *Small* **6**, 2130-2134,  
339 doi:10.1002/smll.201000949 (2010).



- 340 32 Leidner, A. *et al.* Biopebbles: DNA-functionalized core–shell silica nanospheres for  
341 cellular uptake and cell guidance studies. *Advanced Functional Materials* **28**, 1707572,  
342 doi:10.1002/adfm.201707572 (2018).
- 343 33 Sun, P. *et al.* Biopebble containers: DNA-directed surface assembly of mesoporous silica  
344 nanoparticles for cell studies. *Small* **15**, 1900083, doi:10.1002/smll.201900083 (2019).
- 345 34 van Gaal, E. V. B., Spierenburg, G., Hennink, W. E., Crommelin, D. J. A. &  
346 Mastrobattista, E. Flow cytometry for rapid size determination and sorting of nucleic acid  
347 containing nanoparticles in biological fluids. *Journal of Controlled Release* **141**, 328-  
348 338, doi:10.1016/j.jconrel.2009.09.009 (2010).
- 349 35 Lian, H., He, S., Chen, C. & Yan, X. Flow cytometric analysis of nanoscale biological  
350 particles and organelles. *Annual Review of Analytical Chemistry* **12**, 389-409,  
351 doi:10.1146/annurev-anchem-061318-115042 (2019).
- 352 36 Perfetto, S. P., Chattopadhyay, P. K. & Roederer, M. Seventeen-colour flow cytometry:  
353 unravelling the immune system. *Nature Reviews Immunology* **4**, 648-655,  
354 doi:10.1038/nri1416 (2004).
- 355 37 Mage, P. L. *et al.* Shape-based separation of synthetic microparticles. *Nature Materials*  
356 **18**, 82-89, doi:10.1038/s41563-018-0244-9 (2019).
- 357 38 Plesa, C., Sidore, A. M., Lubock, N. B., Zhang, D. & Kosuri, S. Multiplexed gene  
358 synthesis in emulsions for exploring protein functional landscapes. *Science* **359**, 343-347,  
359 doi:10.1126/science.aao5167 (2018).
- 360 39 Baum, E. B. Building an associative memory vastly larger than the brain. *Science* **268**,  
361 583-585 (1995).

362 40 Song, X. & Reif, J. Nucleic acid databases and molecular-scale computing. *ACS Nano*  
363 13, 6256-6268, doi:10.1021/acsnano.9b02562 (2019).

364

365 **Acknowledgments.** We gratefully acknowledge fruitful discussions with Charles Leiserson and  
366 Tao B. Schardl on the scalability and generalizability of our barcoding approach. We thank Glenn  
367 Paradis, Michael Jennings, and Michele Griffin of the Flow Cytometry Core at the Koch Institute  
368 in MIT and Patricia Rogers of the Flow Cytometry Facility at the Broad Institute of Harvard and  
369 MIT for assistance and fruitful discussions in developing the flow cytometry workflow. We also  
370 thank David Mankus of the Nanotechnology Materials Core Facility at the Koch Institute in MIT  
371 for assistance in the imaging of the particles using the scanning electron microscope and Alla  
372 Leshinsky of the Biopolymer and Proteomics Core at the Koch Institute at MIT for assistance in  
373 mass spectrometry.

374 **Funding.** M.B., J.L.B., T.R.S., and J.B. gratefully acknowledge funding from the Office of Naval  
375 Research N00014-17-1-2609, N00014-16-1-2506, N00014-12-1-0621, and N00014-18-1-2290  
376 and the National Science Foundation CCF-1564025 and CBET-1729397. Additional funding to  
377 J.B. was provided through an NSF Graduate Research Fellowship (Grant # 1122374). P.C.B. was  
378 supported by a Career Award at the Scientific Interface from the Burroughs Wellcome Fund.  
379 C.M.A. was supported by NIH grant F32CA236425.

380 **Author contributions.** J.L.B., T.R.S., and M.B. designed the file labeling and selection scheme.  
381 J.L.B., T.R.S., and C.M.A. implemented the file selection scheme using FAS. J.B. and T.R.S.  
382 developed the encoding scheme and metadata tagging of the images to DNA. T.R.S. designed the  
383 plasmid for encoding imaging. H.H. and T.R.S. performed the cloning, transformation, and  
384 purification of the plasmids. J.L.B. synthesized and purified all the TAMRA and AFDye 647-

385 labelled DNA oligonucleotides. J.L.B. characterized the particles. J.L.B. developed the synthetic  
386 route to attach DNA barcodes on the surface of the particles. J.L.B. performed the encapsulation,  
387 barcoding, sorting, reverse encapsulation of the particles after sorting, and desalting. T.R.S., H.H.,  
388 and M.R. performed the sequencing. J.B. performed computational validation of the orthogonality  
389 of barcode sequences. J.B. developed the computational workflow to analyze the sequencing data,  
390 including statistical analyses. M.B. conceived of the file system and supervised the entire project.  
391 P.C.B. supervised the FAS selection and supervised the sequencing workflow. All authors  
392 analyzed the data and equally contributed to the writing of the manuscript.

393 **Competing interests.** T.R.S., J.L.B., J.B. & M.B. have filed provisional patents (17/029,948 and  
394 16/012,583) related to this work.

395 **Materials and correspondence.** Gene sequences and plasmid maps are available from AddGene  
396 (<https://www.addgene.org/depositing/77231/>). Software for sequence encoding and decoding is  
397 publicly available on GitHub (<https://github.com/lcbb/DNA-Memory-Blocks/>). All the data files  
398 used to generate the plots in this manuscript are available from M.B. upon request.

399 **Online content.** Any methods, additional references, and supplementary information are available  
400 at <https://doi.org/10.10XX/XXXXXX>.

401

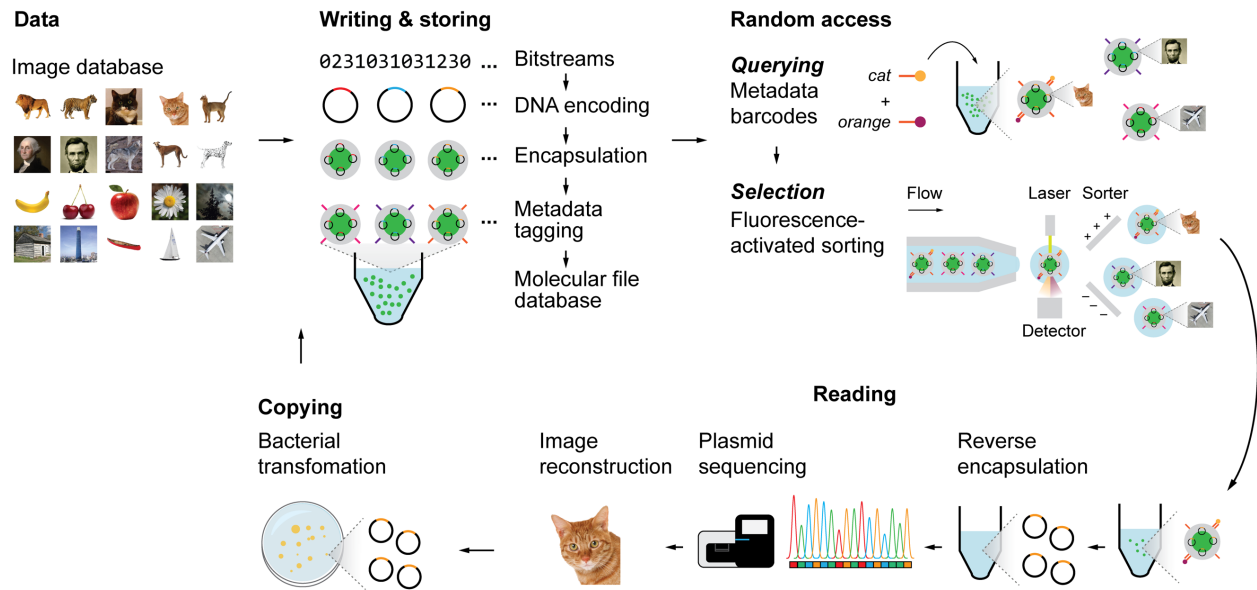

402

403

404 **Figure 1 | Write-access-read cycle for a content-addressable molecular filesystem.** Colored

405 images were converted into  $26 \times 26$ -pixel, black-and-white icon bitmaps. The black-and-white

406 images were then converted into DNA sequences using ternary encoding scheme <sup>7</sup>. The DNA

407 sequences that encoded the images (file sequences) were inserted into a pUC19 plasmid vector

408 and encapsulated into silica particles using sol-gel chemistry. Silica capsules were then addressed

409 with content barcodes using orthogonal 25-mer single-stranded DNA strands, which were the final

410 forms of the files. Files were pooled to form the molecular file database. To query a file or several

411 files, fluorescently-labelled 15-mer ssDNA probes that are complementary to file barcodes were

412 added to the data pool. Particles were then sorted with fluorescence-activated sorting (FAS) using

413 two to four fluorescence channels simultaneously. Addition of a chemical etching reagent into the

414 sorted populations released the encapsulated DNA plasmid. Sequences for the encoded images

415 were validated using Sanger sequencing or Illumina MiniSeq. Because plasmids were used to

416 encode information, re-transformation of the released plasmids into bacteria to replenish the

417 molecular file database thereby closed the write-access-read cycle.

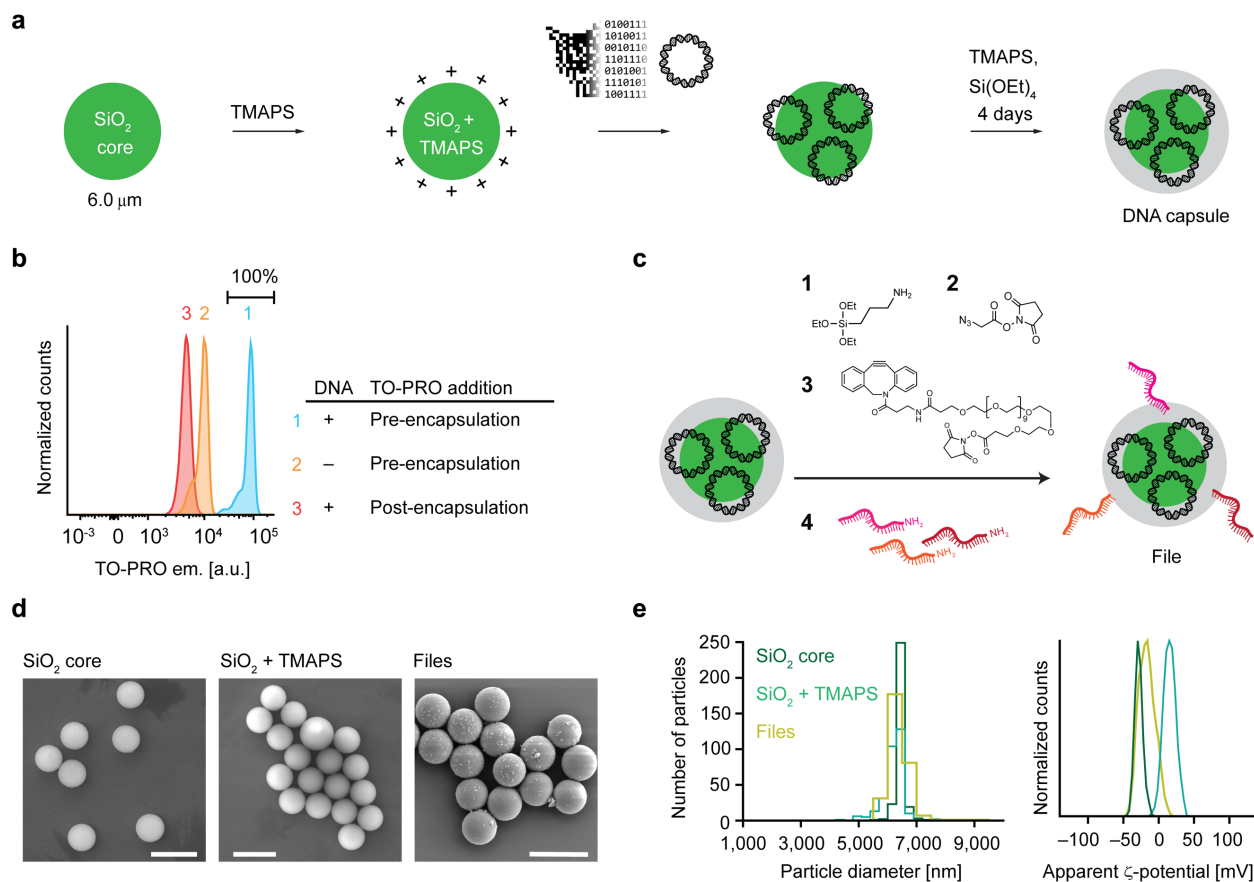

418

419

420 **Figure 2 | Encapsulation of DNA plasmids into silica and surface barcoding. a**, Workflow of

421 silica encapsulation<sup>20</sup>. **b**, Raw fluorescence data from FAS experiments to detect DNA staining of

422 TO-PRO during or after encapsulation. **c**, Functionalization of encapsulated DNA particles. **d**,

423 Scanning electron microscopy images of bare silica particles, silica particles functionalized with

424 TMAPS, and the file. **e**, Distribution of particle sizes determined from microscopy data (left) and

425 zeta potential analyses of silica particles and files.

426

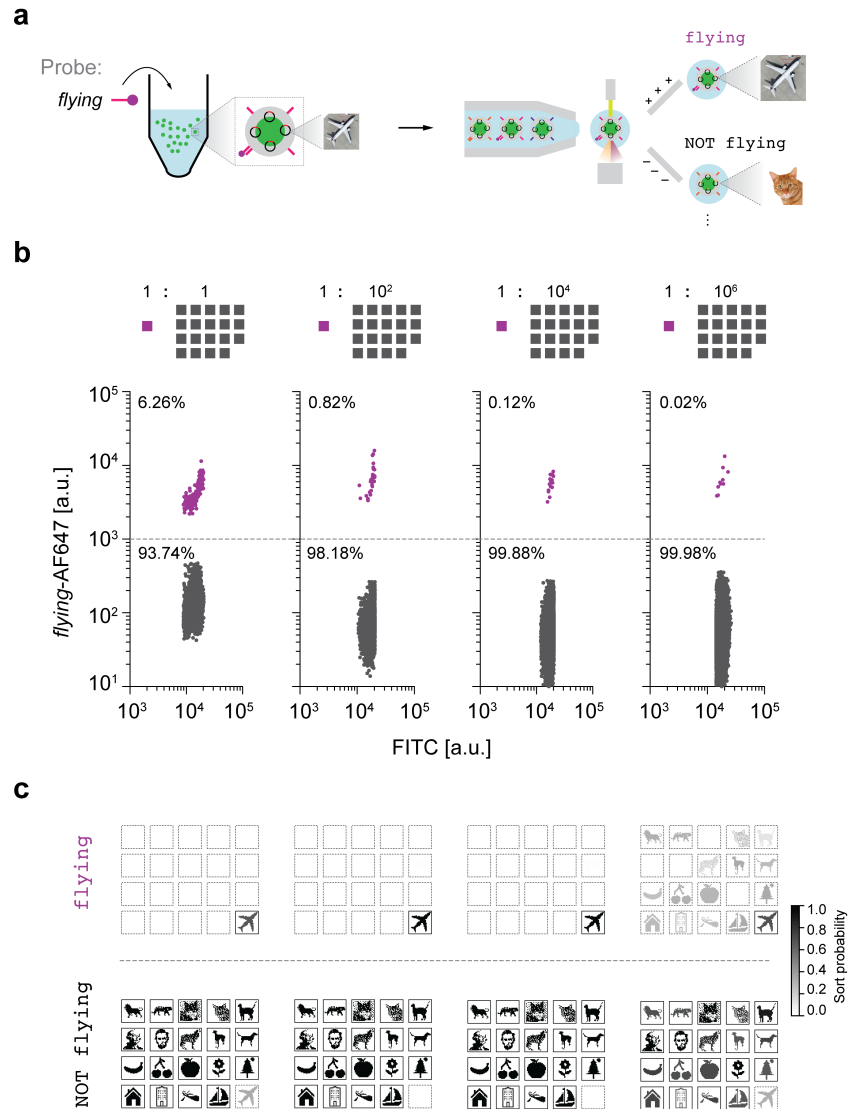

427

428

429 **Figure 3 | Single-barcode sorting.** **a**, Schematic diagram of file sorting using FAS. **b**, Sorting of

430 *Airplane* from varying relative abundance of the other nineteen files as background. Percentages

431 represent the numbers of particles that were sorted in the gate. Colored traces in each of the sorting

432 plots indicate the target population. **c**, Sequencing validation using Illumina MiniSeq. Sort

433 probability is the probability that a file is sorted into one gated population over the other gated

434 populations. Boxes with solid outlines indicate files that should be sorted into the specified gate.

435 Other files have dashed outlines.

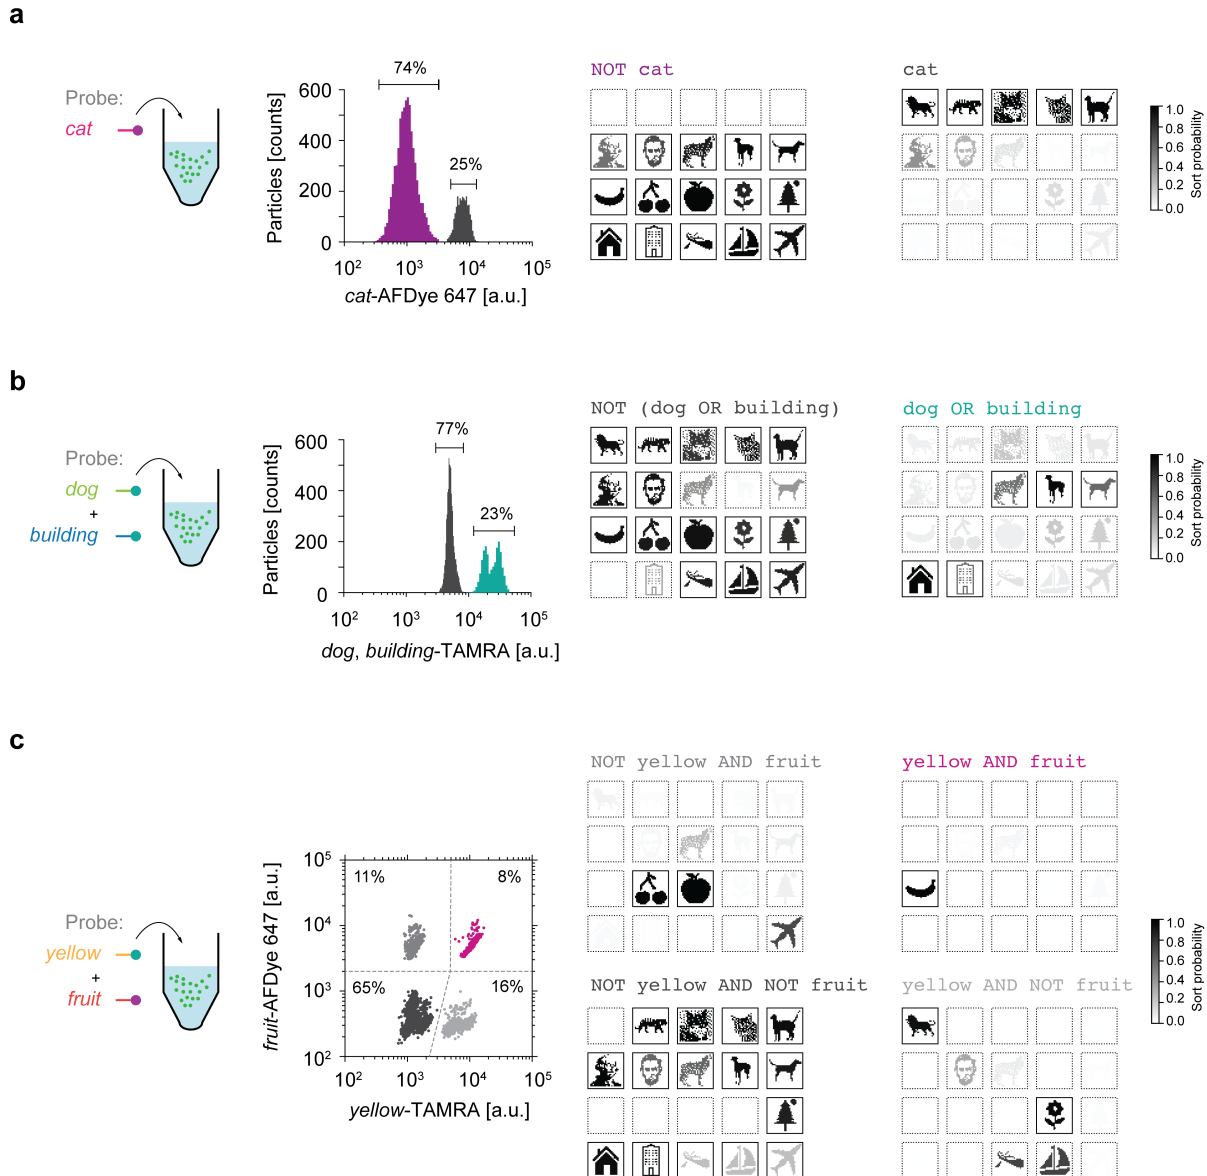

436

437

438 **Figure 4 | Fundamental Boolean logic gates. a**, NOT *cat* selection. Raw fluorescence trace

439 from the FAS system (left) plotted on a 1D sorting plot showing the percent of particles that were

440 sorted in each gate. Sequencing using Illumina MiniSeq tested selection specificity (right). **b**, dog

441 OR *building* selection. Raw fluorescence trace from the FAS system (left) plotted on a 1D

442 sorting plot showing the percent of particles that were sorted in each gate. Sequencing using

443 Illumina MiniSeq evaluated sorting using the OR gate (right). **c**, A 2D sorting plot to perform a

444 yellow AND fruit gate. Percentages in each quadrant show the percentages of particles that  
445 were sorted in each gate. Colored traces in all of the sorting plots indicate the target populations.  
446 Sort probability is the probability that a file is sorted into one gated population versus the other  
447 gated populations. Boxes with solid outlines indicate files that were intended to sort into the  
448 specified gate. Other files have dashed outlines.

449



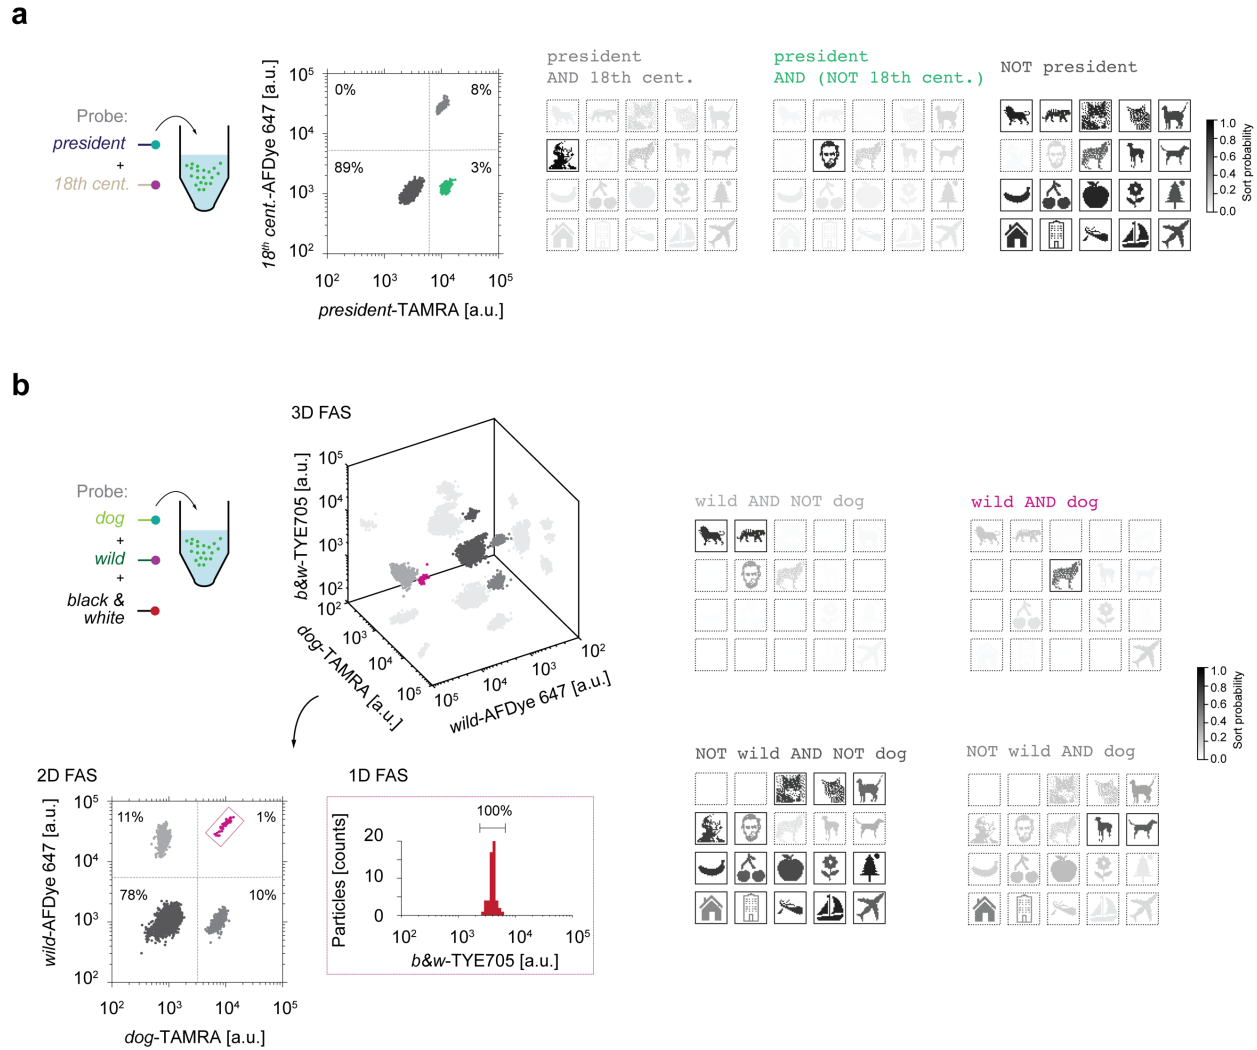

450

451

452 **Figure 5 | Arbitrary logic searching. a, president AND (NOT 18<sup>th</sup> century) sorting.**

453 A 2D sorting plot (middle) was used to sort *Lincoln* by selecting a population that has high

454 TAMRA fluorescence but low AFDye 647 fluorescence. Sequencing using MiniSeq offered

455 quantitative evaluation of the sorted populations. **b, Multiple fluorescence channels were projected**

456 into a 3D FAS plot (left and top). There are three possible 2D plots that can be used for sorting.

457 To select the *Wolf* image using the query wild AND dog, a 2D plot of *wild* versus *dog* was first

458 selected and then populations selected using quadrant gates (left and bottom). One of the quadrants

459 were then selected where the *Wolf* image should belong based on the wild AND dog query in

460 order to test whether only a single population was present in the TYE705 fluorescence channel.  
461 Sequencing quantified the sorted populations (right) using Illumina MiniSeq. Sort probability is  
462 the probability that a file was sorted into one gated population over the other gated populations.  
463 Boxes with solid outlines indicate files that would ideally be sorted into the specified gate. Other  
464 files have dashed outlines.  
465
